# Supplementary material for: Disparities in Cardiovascular Disease Outcomes Among Pregnant and Post‐Partum Women
Source: PubMed Central journal article supplement — J Am Heart Assoc. 2020 Dec 16;10(1):e017832. doi: 10.1161/JAHA.120.017832 (PMC7955477; doi:10.1161/jaha.120.017832), 2020-12-16
Supplement: JAH3-10-e017832-s001.pdf [file JAH3-10-e017832-s001.pdf]

# **SUPPLEMENTAL MATERIAL**

**Table S1. Pregnancy related diagnosis codes.**

| <b>Diagnosis</b>            | <b>ICD-9-CM code</b>                                                                                                                                                                                                     | <b>ICD-10-CM code</b>                                                                                                                                                                                                                                                                                                     |
|-----------------------------|--------------------------------------------------------------------------------------------------------------------------------------------------------------------------------------------------------------------------|---------------------------------------------------------------------------------------------------------------------------------------------------------------------------------------------------------------------------------------------------------------------------------------------------------------------------|
| Antepartum                  | V22.x, V23.x, V28.x, V30.x - V37.x, V39.x, V91.x, 630-633, 638, 640-679 with fifth code as '3', without mention of a labor and delivery or post-partum ICD-9 code.                                                       | 000-008 - Pregnancy with abortive outcome<br>009 - Supervision of high-risk pregnancy<br>010-016 - Edema, proteinuria and hypertensive disorders in pregnancy, childbirth and the puerperium<br>020-029 - Other maternal disorders predominantly related to pregnancy                                                     |
| Labor                       | Procedure Codes: 72.x - 74.x<br>Diagnosis Codes: V27.x, V30.x00, V30.x01, V31.x00, V31.x01, V32.x00, V32.x01, V33.x00, V33.x01, V34.x00, V34.x01, V35.x00, V35.x01, V36.x00, V36.x01, V37.x00, V37.x01, V39.x00, V39.x01 | 030-048 - Maternal care related to the fetus and amniotic cavity and possible delivery problems<br>060-077 - Complications of labor and delivery<br>080-082 - Encounter for delivery<br>085-092 - Complications predominantly related to the puerperium<br>094-09A - Other obstetric conditions, not elsewhere classified |
| Postpartum                  | V24.x, V27.x, 634-637, 639, 640-679 with fifth code as '1', '2', '4', without mention of a labor and delivery code.                                                                                                      |                                                                                                                                                                                                                                                                                                                           |
| Pregnancy, Unspecified time | 640-679 with fifth code as '0' OR with both antepartum and post-partum codes present without mention of a labor and delivery code                                                                                        |                                                                                                                                                                                                                                                                                                                           |
| Gestational Hypertension    | 642.3x                                                                                                                                                                                                                   | O13.x                                                                                                                                                                                                                                                                                                                     |
| Pre-eclampsia/ Eclampsia    | 642.4x, 642.5x, 642.6x, 642.7x                                                                                                                                                                                           | O14.x, O15.x                                                                                                                                                                                                                                                                                                              |
| Gestational Diabetes        | 648.0x                                                                                                                                                                                                                   | O24.4x                                                                                                                                                                                                                                                                                                                    |
| Cesarean Section            | Procedure Codes: 74.x, Diagnosis Codes: 669.7                                                                                                                                                                            | O82, 10D00Z0, 10D00Z1, 10D00Z2                                                                                                                                                                                                                                                                                            |

Other comorbidities diagnosis codes:

| <b>Diagnosis</b>              | <b>ICD-9-CM code</b>                                   | <b>ICD-10-CM code</b>                                                                         |
|-------------------------------|--------------------------------------------------------|-----------------------------------------------------------------------------------------------|
| AMI                           | 410                                                    | I21, I22                                                                                      |
| STEMI                         | 410.0, 410.1, 410.2, 410.3, 410.4, 410.5, 410.6, 410.8 | I21.0, I21.1, I21.2, I21.3, I22.0, I22.1, I22.8, I22.9                                        |
| NSTEMI                        | 410.7                                                  | I21.4, I22.2                                                                                  |
| Unspecified AMI               | 410.9                                                  | I21.9, I21.A1, I21.A9                                                                         |
| Prior myocardial infarction   | 412                                                    | I25.2                                                                                         |
| Prior PCI                     | V45.82                                                 | Z95.5, Z98.61                                                                                 |
| Prior CABG                    | V45.81, 414.02, 414.03, 414.04, 414.05                 | I25.700, I25.708, I25.709, I25.71, I25.72, I25.73, I25.76,<br>I25.79, I25.810, I25.812, Z95.1 |
| Prior pacemaker               | V45.01                                                 | Z95.0                                                                                         |
| Prior cerebrovascular disease | 438, V12.54                                            | I699.1, Z86.73                                                                                |
| Mitral valve disease          | 394.0, 394.1, 394.2, 746.5, 746.6                      | I05.0, I05.1, I05.2, I34.0, I34.2, Q23.2, Q23.3                                               |

|                                                |                                                                                                                                                                                                                                                                                                                                                                                                                                                |                                                                                                                                                                                                                                                                                                                                                                                                                                                                                                                |
|------------------------------------------------|------------------------------------------------------------------------------------------------------------------------------------------------------------------------------------------------------------------------------------------------------------------------------------------------------------------------------------------------------------------------------------------------------------------------------------------------|----------------------------------------------------------------------------------------------------------------------------------------------------------------------------------------------------------------------------------------------------------------------------------------------------------------------------------------------------------------------------------------------------------------------------------------------------------------------------------------------------------------|
| Tricuspid valve disease                        | 397.0, 424.2, 746.1                                                                                                                                                                                                                                                                                                                                                                                                                            | I07.0, I07.1, I07.2, I36.0, I36.1, I36.2, Q22.4                                                                                                                                                                                                                                                                                                                                                                                                                                                                |
| Atrial fibrillation                            | 427.31                                                                                                                                                                                                                                                                                                                                                                                                                                         | I48.0, I48.1, I48.2, I48.91                                                                                                                                                                                                                                                                                                                                                                                                                                                                                    |
| Atrial flutter                                 | 427.32                                                                                                                                                                                                                                                                                                                                                                                                                                         | I48.3, I48.4, I48.92                                                                                                                                                                                                                                                                                                                                                                                                                                                                                           |
| Chronic pulmonary disease                      | From the Elixhauser comorbidities provided by the AHRQ comorbidity measures                                                                                                                                                                                                                                                                                                                                                                    |                                                                                                                                                                                                                                                                                                                                                                                                                                                                                                                |
| Carotid disease                                | 433.1                                                                                                                                                                                                                                                                                                                                                                                                                                          | I65.2                                                                                                                                                                                                                                                                                                                                                                                                                                                                                                          |
| Peripheral vascular disease                    | From the Elixhauser comorbidities provided by the AHRQ comorbidity measures                                                                                                                                                                                                                                                                                                                                                                    |                                                                                                                                                                                                                                                                                                                                                                                                                                                                                                                |
| Renal failure                                  | From the Elixhauser comorbidities provided by the AHRQ comorbidity measures                                                                                                                                                                                                                                                                                                                                                                    |                                                                                                                                                                                                                                                                                                                                                                                                                                                                                                                |
| Liver disease                                  | From the Elixhauser comorbidities provided by the AHRQ comorbidity measures                                                                                                                                                                                                                                                                                                                                                                    |                                                                                                                                                                                                                                                                                                                                                                                                                                                                                                                |
| Malignancy                                     | 140-165, 170-176, 179-195, 199-209                                                                                                                                                                                                                                                                                                                                                                                                             | C00-C97                                                                                                                                                                                                                                                                                                                                                                                                                                                                                                        |
| Rheumatoid arthritis/collagen vascular disease | From the Elixhauser comorbidities provided by the AHRQ comorbidity measures                                                                                                                                                                                                                                                                                                                                                                    |                                                                                                                                                                                                                                                                                                                                                                                                                                                                                                                |
| Hypothyroidism                                 | From the Elixhauser comorbidities provided by the AHRQ comorbidity measures                                                                                                                                                                                                                                                                                                                                                                    |                                                                                                                                                                                                                                                                                                                                                                                                                                                                                                                |
| Coagulopathy                                   | From the Elixhauser comorbidities provided by the AHRQ comorbidity measures                                                                                                                                                                                                                                                                                                                                                                    |                                                                                                                                                                                                                                                                                                                                                                                                                                                                                                                |
| Deficiency anemia                              | From the Elixhauser comorbidities provided by the AHRQ comorbidity measures                                                                                                                                                                                                                                                                                                                                                                    |                                                                                                                                                                                                                                                                                                                                                                                                                                                                                                                |
| Chronic blood loss anemia                      | From the Elixhauser comorbidities provided by the AHRQ comorbidity measures                                                                                                                                                                                                                                                                                                                                                                    |                                                                                                                                                                                                                                                                                                                                                                                                                                                                                                                |
| Depression                                     | From the Elixhauser comorbidities provided by the AHRQ comorbidity measures                                                                                                                                                                                                                                                                                                                                                                    |                                                                                                                                                                                                                                                                                                                                                                                                                                                                                                                |
| Dementia                                       | 290, 294.10, 294.11, 294.20, 294.21,<br>330.8, 330.9, 331.0, 331.1, 331.2,<br>331.6, 331.7, 331.82, 331.83, 331.89,<br>331.9                                                                                                                                                                                                                                                                                                                   | F01, F02, F03, G30, G31                                                                                                                                                                                                                                                                                                                                                                                                                                                                                        |
| Hypertension                                   | 401.1, 401.9, 642.00, 642.01, 642.02,<br>642.03, 642.04, 401.0, 4372, 642.20,<br>642.21, 642.22, 642.23, 642.24,<br>402.00, 402.10, 402.90, 405.09,<br>405.19, 405.99, 402.01, 402.11,<br>402.91, 403.00, 403.10, 403.90,<br>405.01, 405.11, 405.91, 642.10,<br>642.11, 642.12, 642.13, 642.14,<br>403.01, 403.11, 403.91, 404.00,<br>404.10, 404.90, 404.01., 404.11,<br>404.91, 404.02., 404.12, 404.92,<br>404.03., 404.13, 404.93, 642.70, | I13.0, I13.2, I13.10, I13.11, I129, I15.0, I15.1, I120, I10,<br>O10.011, O10.012, O10.013, O10.019, O10.02, O10.03,<br>O10.911, O10.912, O10.913, O10.919, O10.92, O10.93,<br>I160, I161, I169, I674, O10.111, O10.112, O10.113,<br>O10.119, O10.12, O10.13, O10.211, O10.212, O10.213,<br>O10.219, O10.22, O10.23, O10.311, O10.312, O10.313,<br>O10.319, O10.32, O10.33, O10.411, O10.412, O10.413,<br>O10.419, O10.42, O10.43, O11.1, O11.2, O11.3, O11.4,<br>O11.5, O11.9, I110, I119, I15.2, I15.8, I15.9 |

|                     |                                                                                                        |                                                                                                                                |
|---------------------|--------------------------------------------------------------------------------------------------------|--------------------------------------------------------------------------------------------------------------------------------|
|                     | 642.71, 642.72, 642.73, 642.74,<br>642.90, 642.91, 642.92, 642.93,<br>642.94                           |                                                                                                                                |
| Diabetes mellitus   | From the Elixhauser comorbidities provided by the AHRQ comorbidity measures                            |                                                                                                                                |
| Dyslipidemia        | 272.0, 272.1, 272.2, 272.3, 272.4                                                                      | E78.0, E78.00, E78.01, E78.1, E78.2, E78.3, E78.4,<br>E78.5, E78.81, E78.89, E8889, E78.9                                      |
| Obesity             | From the Elixhauser comorbidities provided by the AHRQ comorbidity measures                            |                                                                                                                                |
| Smoking history     | V15.82, 305.1                                                                                          | Z87.891, F17.200 to F17.229, F172.90, F172.93 ,<br>F172.98 ,<br>F172.99                                                        |
| Acute heart failure | 428.21, 428.23, 428.31, 428.33,<br>428.41, 428.43                                                      | I50.21, I50.23, I50.31, I50.33, I50.41, I50.43                                                                                 |
| Cardiogenic shock   | 785.51                                                                                                 | R57.0                                                                                                                          |
| Stroke              | 430, 431, 432, 433.01, 433.11,<br>433.21,<br>433.31, 433.81, 433.91, 434.01,<br>434.11, 434.91, 997.02 | I60, I61, I62, I63, I64                                                                                                        |
| Acute kidney injury | 584                                                                                                    | N17                                                                                                                            |
| Bleeding            | 998.11, 998.12, 285.1                                                                                  | D62, G97.32, G97.52, I97.410, I97.411, I97.418,<br>I97.42,<br>I97.610, I97.611, I97.618, I97.620, T82.837, T82.838,<br>T85.838 |

ICD-9-CM = International Classification of Diseases, Ninth Revision, Clinical Modification; ICD-10-CM = International Classification of Diseases, Tenth Revision, Clinical Modification; TAVR = transcatheter aortic valve replacement; SAVR = surgical aortic valve replacement; PCI = percutaneous coronary intervention; CABG = coronary artery bypass grafting; AMI = acute myocardial infarction; STEMI = ST-segment elevation myocardial infarction; NSTEMI = non-ST-elevation myocardial infarction; AHRQ = Agency for Healthcare Research and Quality.

**Table S2. Hospital-related characteristics of the included cohort.**

|                                        | White<br>(n=21,663,575)<br>46.4% | African American<br>(n=6,302,089)<br>13.5% | Hispanic<br>(n=8,914,065)<br>19.1% | Asian/Pacific<br>Islander<br>(n=2,251,824)<br>4.8% | P<br>value |
|----------------------------------------|----------------------------------|--------------------------------------------|------------------------------------|----------------------------------------------------|------------|
| Hospital ownership                     |                                  |                                            |                                    |                                                    | <.001      |
| <b>Government, nonfederal</b>          | 11.05%                           | 15.47%                                     | 17.93%                             | 11.33%                                             |            |
| <b>Private, not-profit</b>             | 76.09%                           | 69.15%                                     | 61.31%                             | 75.91%                                             |            |
| <b>Private, invest-own</b>             | 12.86%                           | 15.39%                                     | 20.76%                             | 12.76%                                             |            |
| Hospital bed-size                      |                                  |                                            |                                    |                                                    | <.001      |
| <b>Small</b>                           | 14.75%                           | 10.74%                                     | 12.25%                             | 10.78%                                             |            |
| <b>Medium</b>                          | 28.07%                           | 29.54%                                     | 27.78%                             | 29.43%                                             |            |
| <b>Large</b>                           | 57.18%                           | 59.72%                                     | 59.96%                             | 59.80%                                             |            |
| Hospital teaching status               |                                  |                                            |                                    |                                                    | <.001      |
| <b>Rural</b>                           | 13.49%                           | 6.22%                                      | 4.57%                              | 2.98%                                              |            |
| <b>Urban nonteaching</b>               | 36.60%                           | 26.68%                                     | 38.52%                             | 34.70%                                             |            |
| <b>Urban teaching</b>                  | 49.91%                           | 67.10%                                     | 56.91%                             | 62.32%                                             |            |
| Hospital region                        |                                  |                                            |                                    |                                                    | <.001      |
| <b>Northeast</b>                       | 19.15%                           | 17.43%                                     | 13.19%                             | 20.35%                                             |            |
| <b>Midwest</b>                         | 22.48%                           | 16.82%                                     | 6.66%                              | 9.48%                                              |            |
| <b>South</b>                           | 38.16%                           | 57.06%                                     | 38.41%                             | 21.40%                                             |            |
| <b>West</b>                            | 20.22%                           | 8.68%                                      | 41.74%                             | 48.77%                                             |            |
| Patient disposition                    |                                  |                                            |                                    |                                                    | <.001      |
| <b>Routine</b>                         | 97.51%                           | 96.28%                                     | 98.33%                             | 98.12%                                             |            |
| <b>Transfer to Short-term Hospital</b> | 0.43%                            | 0.49%                                      | 0.33%                              | 0.27%                                              |            |
| <b>Skilled Nursing Facility (SNF)</b>  | 0.11%                            | 0.21%                                      | 0.08%                              | 0.06%                                              |            |
| <b>Home Health Care (HHC)</b>          | 1.70%                            | 2.34%                                      | 1.02%                              | 1.43%                                              |            |
| <b>Against Medical Advice (AMA)</b>    | 0.23%                            | 0.66%                                      | 0.23%                              | 0.11%                                              |            |

**Table S3. Sensitivity analysis of temporal trends of outcomes by race in females of known risk factors for cardiovascular disease.**

|                         | <b>2007</b> | <b>2008</b> | <b>2009</b> | <b>2010</b> | <b>2011</b> | <b>2012</b> | <b>2013</b> | <b>2014</b> | <b>2015</b> | <b>2016</b> | <b>2017</b> |
|-------------------------|-------------|-------------|-------------|-------------|-------------|-------------|-------------|-------------|-------------|-------------|-------------|
| <b>White</b>            |             |             |             |             |             |             |             |             |             |             |             |
| <b>Mortality</b>        | 0.46<br>%   | 0.45<br>%   | 0.45<br>%   | 0.38<br>%   | 0.55<br>%   | 0.40<br>%   | 0.30<br>%   | 0.18<br>%   | 0.09<br>%   | 0.11<br>%   | 0.16<br>%   |
| <b>AMI</b>              | 1.28<br>%   | 0.80<br>%   | 1.40<br>%   | 1.03<br>%   | 0.99<br>%   | 1.06<br>%   | 0.90<br>%   | 0.65<br>%   | 0.95<br>%   | 0.32<br>%   | 0.53<br>%   |
| <b>Stroke</b>           | 1.46<br>%   | 1.84<br>%   | 2.00<br>%   | 2.06<br>%   | 1.67<br>%   | 1.46<br>%   | 1.49<br>%   | 1.33<br>%   | 0.71<br>%   | 0.25<br>%   | 0.37<br>%   |
| <b>PE</b>               | 0.41<br>%   | 0.31<br>%   | 0.33<br>%   | 0.32<br>%   | 0.59<br>%   | 0.35<br>%   | 0.34<br>%   | 0.36<br>%   | 0.36<br>%   | 0.30<br>%   | 0.28<br>%   |
| <b>African American</b> |             |             |             |             |             |             |             |             |             |             |             |
| <b>Mortality</b>        | 1.32<br>%   | 0.62<br>%   | 1.82<br>%   | 1.30<br>%   | 0.55<br>%   | 0.81<br>%   | 0.89<br>%   | 0.48<br>%   | 0.54<br>%   | 0.28<br>%   | 0.38<br>%   |
| <b>AMI</b>              | 2.61<br>%   | 1.48<br>%   | 2.15<br>%   | 1.30<br>%   | 2.02<br>%   | 1.31<br>%   | 1.18<br>%   | 1.26<br>%   | 1.01<br>%   | 0.80<br>%   | 1.06<br>%   |
| <b>Stroke</b>           | 3.55<br>%   | 2.25<br>%   | 2.47<br>%   | 2.89<br>%   | 2.39<br>%   | 2.01<br>%   | 2.37<br>%   | 2.51<br>%   | 1.15<br>%   | 0.38<br>%   | 0.51<br>%   |
| <b>PE</b>               | 0.90<br>%   | 0.74<br>%   | 0.59<br>%   | 0.86<br>%   | 1.25<br>%   | 0.60<br>%   | 0.20<br>%   | 0.39<br>%   | 0.34<br>%   | 0.59<br>%   | 0.38<br>%   |
| <b>Hispanic</b>         |             |             |             |             |             |             |             |             |             |             |             |
| <b>Mortality</b>        | 1.05<br>%   | 0.92<br>%   | 0.25<br>%   | 1.29<br>%   | 0.42<br>%   | 0.21<br>%   | 0.18<br>%   | 0.33<br>%   | 0.11<br>%   | 0.18<br>%   | 0.08<br>%   |
| <b>AMI</b>              | 1.27<br>%   | 0.49<br>%   | 0.50<br>%   | 1.55<br>%   | 0.38<br>%   | 1.87<br>%   | 1.09<br>%   | 0.49<br>%   | 0.77<br>%   | 0.27<br>%   | 0.49<br>%   |
| <b>Stroke</b>           | 2.00<br>%   | 2.33<br>%   | 2.32<br>%   | 3.52<br>%   | 2.65<br>%   | 3.53<br>%   | 3.64<br>%   | 2.60<br>%   | 0.88<br>%   | 0.14<br>%   | 0.29<br>%   |
| <b>PE</b>               | 0.28<br>%   | 0.24<br>%   | 0.45<br>%   | 0.21<br>%   | 0.00<br>%   | 0.00<br>%   | 0.18<br>%   | 0.00<br>%   | 0.11<br>%   | 0.18<br>%   | 0.08<br>%   |
